# Supplementary material for: Impact of traditional Chinese medicine treatment on chronic unpredictable mild stress-induced depression-like behaviors: intestinal microbiota and gut microbiome function
Source: Royal Society of Chemistry journal article supplement (doi:10.1039/c9fo00399a), 2019-01-01
Supplement: c9fo00399a1.pdf [file c9fo00399a1.pdf]

## Supplementary figures

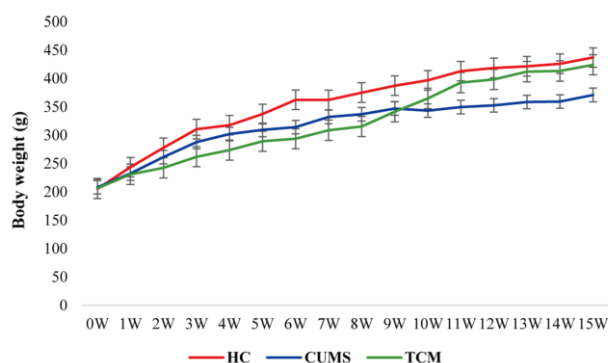

Figure S1. The change tendency of body weight among three groups. All data are expressed as mean  $\pm$  standard error of the mean (SEM) (HC: n=12; CUMS: n=6; TCM: n=19).

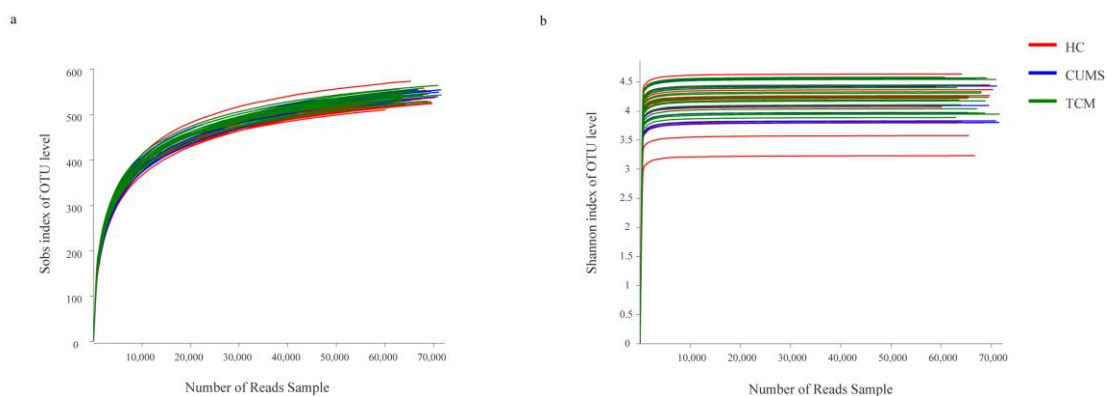

Figure S2. Bacterial rarefaction curves based on (a) Shannon index, and (b) Sobs index. Each sample was distinguished by different colors of lines.

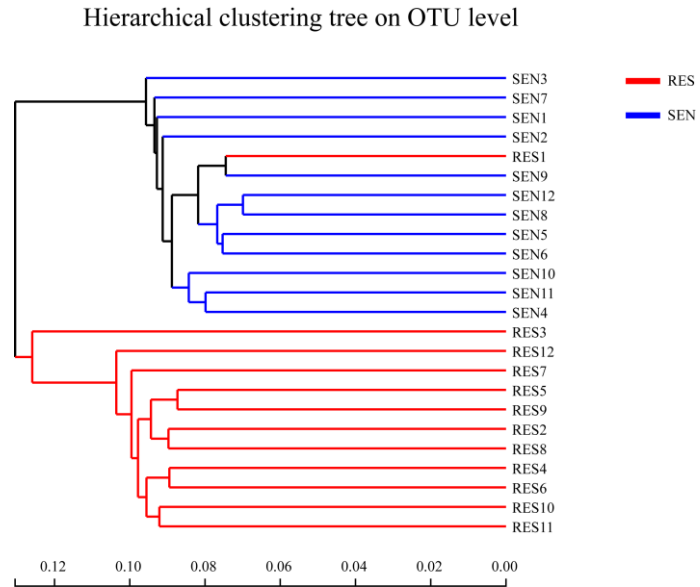

Figure S3. Hierarchical clustering tree analysis was performed at operational taxonomic unit (OTU) level based on bray\_curtis algorithm for SEN and RES group. (SEN: rats are sensitive to CUMS; RES: rats are resistant to CUMS)

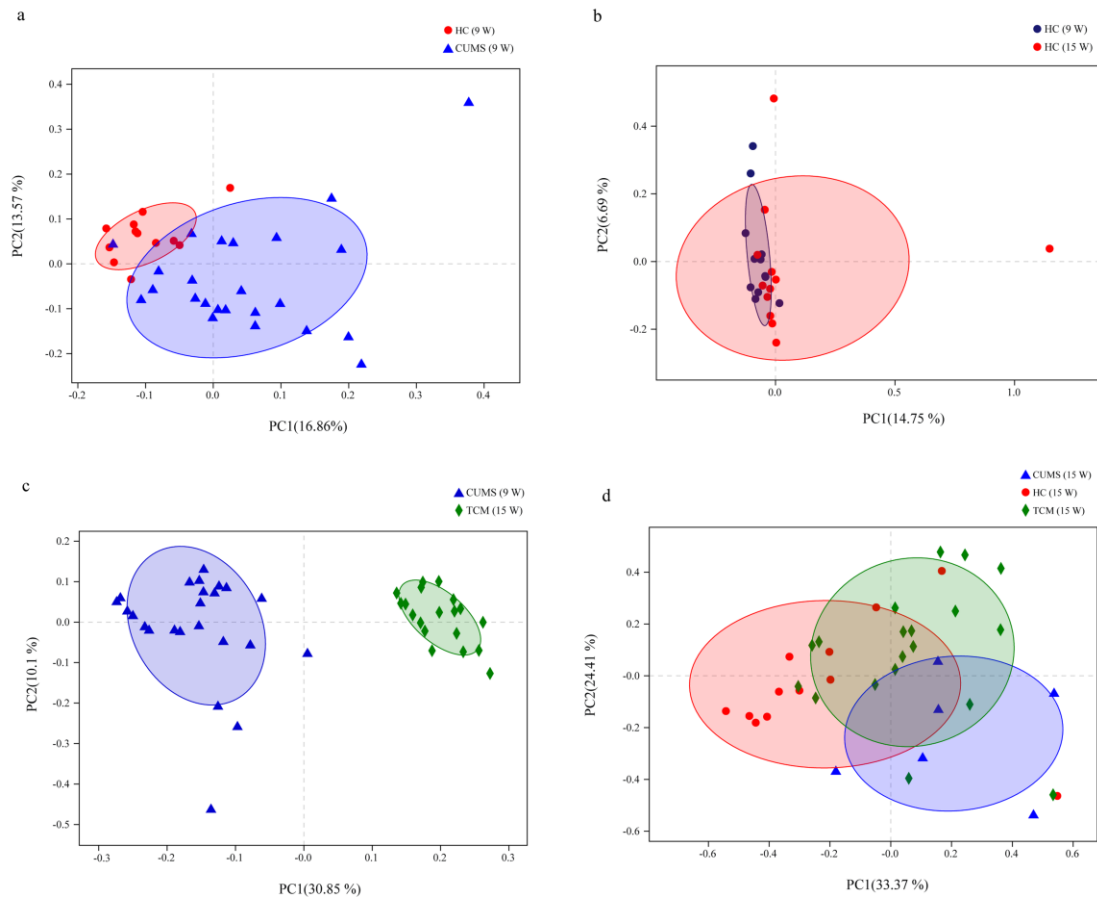

Figure S4. Principal coordinate analysis (PCoA) was performed at operational taxonomic unit (OTU) level based on bray\_curtis algorithm for all samples. Each group is represented in a different color and shape. **(a)** Scatterplot from PCoA showed a clear separation of HC group from CUMS group in Week 9 ( $p < 0.05$ , analysis of similarity (ANOSIM)); Principal coordinates 1 and 2 (PC1 and PC2) represent 16.86%, 13.57% of the variance, respectively (x and y axis) (HC (9 W):  $n=12$ ; CUMS (9 W):  $n=24$ , representative). **(b)** Scatterplot from PCoA presented a similar bacterial composition between HC (9 W) and HC (15 W) (HC (9 W):  $n=12$ ; HC (15 W):  $n=12$ ). **(c)** PCoA Scatterplot identified bacteria compositional difference between pre- and post-TCM treatment group ( $p < 0.05$ , analysis of similarity (ANOSIM)); Principal coordinates 1 and 2 (PC1 and PC2) represent 30.85%, 10.1% of the variance, respectively (x and y axis) (CUMS (9 W):  $n=24$ ; TCM (15 W):  $n=19$ ). **(d)** Scatterplot from PCoA identified bacteria compositional difference among three groups ( $p < 0.05$ , analysis of similarity (ANOSIM)) in Week 15; Principal coordinates 1 and 2 (PC1 and PC2) represent 33.7%, 24.41% of the variance, respectively (x and y axis) (HC:

n=12; CUMS: n=6; TCM: n=19)

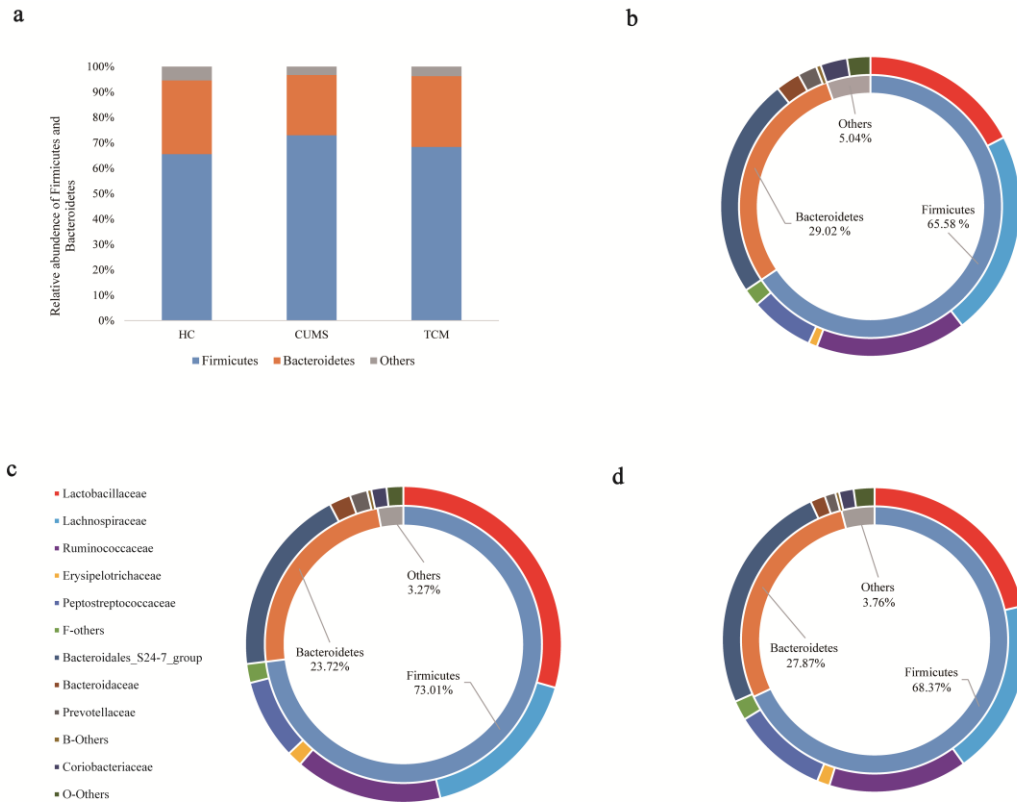

Figure S5. The main phylum and families of representative samples detected in three groups (HC: n=6; CUMS: n=5; TCM: n=6, representative). **(a)** The main phylum detected in the fecal samples. **(b)** The main families detected in the HC group. **(c)** The main families detected in the CUMS group. **(d)** The main families detected in the TCM group.

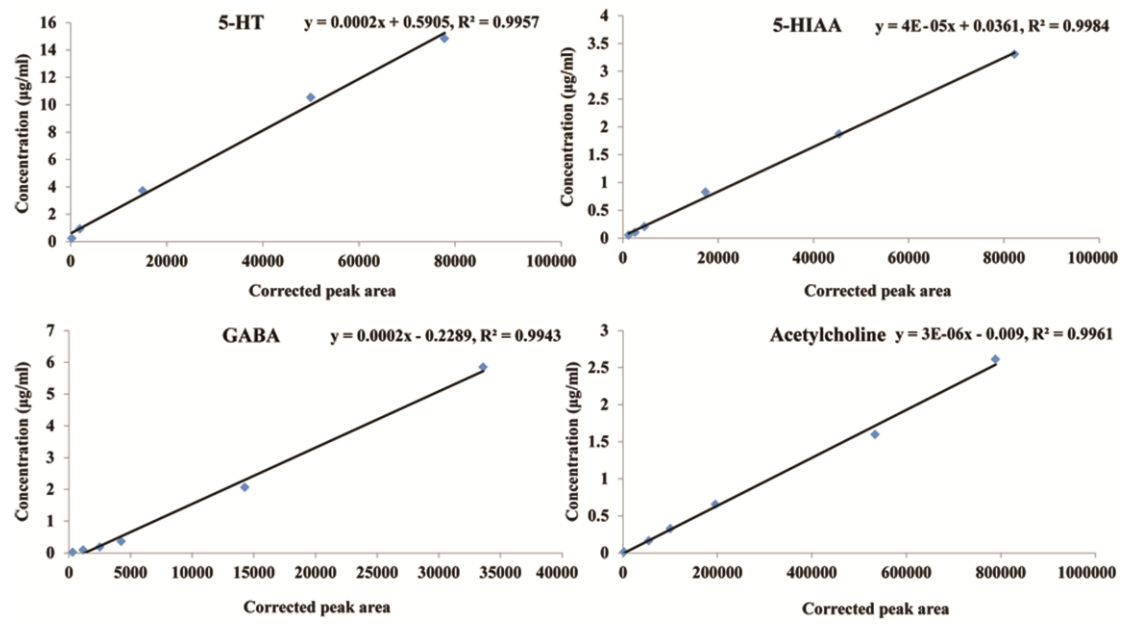

Figure S6. Calibration curves of each external standard

## Supplementary tables

**Table S1. The composition of TCM herbal formula.**

| <b>Herbs</b>                            | <b>Amount (g)</b> |
|-----------------------------------------|-------------------|
| <i>Bupleurum chinense</i> DC.           | 30                |
| <i>Angelica sinensis</i> (Olive.) Diel  | 30                |
| <i>Paeonia lactiflora</i> Pall          | 30                |
| <i>Atractylodes macrocephala</i> Koidz. | 30                |
| <i>Poria cocos</i> (Schw.)Wolf          | 30                |
| <i>Glycyrrhiza uralensis</i> Fisch.     | 15                |
| <i>Zingiber officinale</i> Rosc.        | 10                |
| <i>Mentha haplocalyx</i> Briq.          | 10                |

**Table S2. Contents of active ingredient in Component I and Component II for this formula.**

| <b>Component</b>                       | <b>Active ingredients</b>       | <b>Methods</b> | <b>Amounts (mg/g)</b> |
|----------------------------------------|---------------------------------|----------------|-----------------------|
| <b>Component I</b><br>(164.6 mg/kg/d)  | Ferulic acid                    | HPLC           | 0.05                  |
|                                        | Paeoniflorin                    | HPLC           | 4.88                  |
|                                        | Aurantiamarin                   | HPLC           | 5.14                  |
| <b>Component II</b><br>(31.25 mg/kg/d) | Polyphenols                     | UV             | 500                   |
|                                        | Total Catechins                 | HPLC           | 440                   |
|                                        | Epigallocatechin gallate (EGCG) | HPLC           | 180                   |
|                                        | Caffeine                        | HPLC           | 80                    |

**Table S3. Species richness and diversity of three groups.**

| Group | Numbers of species observed | Community richness |                  | Community diversity |                 |
|-------|-----------------------------|--------------------|------------------|---------------------|-----------------|
|       |                             | Chao 1             | Ace              | Simpson             | shannon         |
| HC    | 501.00 ± 3.8471             | 511.48 ± 11.2696   | 509.20 ± 6.1170  | 0.9573 ± 0.0235     | 6.3081 ± 0.3526 |
| CUMS  | 506.80 ± 12.1326            | 523.09 ± 14.0112   | 523.64 ± 15.9834 | 0.9312 ± 0.0266     | 5.8450 ± 0.4439 |
| TCM   | 506.67 ± 11.1833            | 519.96 ± 10.0392   | 516.19 ± 12.4156 | 0.9493 ± 0.0202     | 6.0899 ± 0.3358 |

**Note:** Mean values ± standard deviation are listed (HC: n=6; CUMS: n=5; TCM: n=6, representative).

**Table S4. Relative abundance of significant different key taxa among three groups.**

| Taxa   | HC                                  | CUMS            | TCM             | <i>p</i> -Value |             |           |       |
|--------|-------------------------------------|-----------------|-----------------|-----------------|-------------|-----------|-------|
|        |                                     |                 |                 | HC vs CUMS      | CUMS vs TCM | HC vs TCM |       |
| Phylum | <i>Firmicutes</i>                   | 65.58 ± 1.6227  | 73.01 ± 2.8019  | 68.37 ± 1.7652  | 0.048       | /         | 0.013 |
|        | <i>Bacteroidetes</i>                | 29.02 ± 2.0397  | 23.72 ± 2.7969  | 27.87 ± 1.8503  | 0.004       | /         | 0.037 |
|        | <i>Actinobacteria</i>               | 3.33 ± 0.7526   | 1.76 ± 0.3288   | 2.01 ± 0.1938   | 0.049       | /         | /     |
|        | <i>Deferribacteres</i>              | 0.1236 ± 0.0533 | 0.0146 ± 0.0027 | 0.0314 ± 0.0036 | 0.037       | /         | /     |
| Class  | <i>Bacilli</i>                      | 18.22 ± 3.6720  | 29.99 ± 4.3518  | 22.08 ± 3.2883  | 0.046       | /         | /     |
|        | <i>unidentified_Deferribacteres</i> | 0.1236 ± 0.0533 | 0.0146 ± 0.0027 | 0.0314 ± 0.0036 | 0.037       | /         | /     |
| Order  | <i>Lactobacillales</i>              | 17.77 ± 3.6628  | 29.78 ± 4.3522  | 21.78 ± 3.2771  | 0.042       | /         | /     |
|        | <i>Bacillales</i>                   | 0.443 ± 0.0699  | 0.2129 ± 0.0107 | 0.3084 ± 0.0314 | 0.005       | /         | /     |
|        | <i>Lactobacillaceae</i>             | 17.39 ± 3.6300  | 29.42 ± 4.3322  | 21.41 ± 3.2594  | 0.041       | /         | /     |
| Family | <i>Clostridiaceae_1</i>             | 0.3330 ± 0.0574 | 0.7393 ± 0.0852 | 0.7486 ± 0.1009 | 0.004       | /         | 0.003 |
|        | <i>Staphylococcaceae</i>            | 0.4315 ± 0.0715 | 0.1984 ± 0.0095 | 0.2915 ± 0.0316 | 0.005       | /         | /     |
|        | <i>Family_XIII</i>                  | 0.4280 ± 0.0449 | 0.3083 ± 0.0225 | 0.3718 ± 0.0364 | 0.043       | /         | /     |
| Family | <i>Deferribacteraceae</i>           | 0.1236 ± 0.0533 | 0.0146 ± 0.0027 | 0.0314 ± 0.0036 | 0.037       | /         | /     |
|        | <i>Streptococcaceae</i>             | 0.191 ± 0.0253  | 0.1233 ± 0.0112 | 0.1436 ± 0.0122 | 0.021       | /         | /     |
| Genus  | <i>Lactobacillus</i>                | 17.39 ± 3.6300  | 29.42 ± 4.3322  | 21.41 ± 3.2594  | 0.041       | /         | /     |
|        | <i>Enterorhabdus</i>                | 1.40 ± 0.2608   | 0.7947 ± 0.1655 | 0.6805 ± 0.0664 | 0.039       | /         | 0.013 |
|        | <i>Ruminococcus_2</i>               | 0.2749 ± 0.0911 | 0.7687 ± 0.1992 | 0.3744 ± 0.0678 | 0.014       | 0.042     | /     |
|        | <i>Roseburia</i>                    | 0.9878 ± 0.0658 | 0.7114 ± 0.0242 | 0.9400 ± 0.0765 | 0.009       | 0.025     | /     |
|        | <i>Clostridium sensu stricto_1</i>  | 0.3330 ± 0.0574 | 0.7393 ± 0.0852 | 0.7486 ± 0.1009 | 0.004       | /         | 0.003 |
|        | <i>Lachnospiraceae_UCG-001</i>      | 0.4970 ± 0.0815 | 0.2386 ± 0.0405 | 0.2575 ± 0.0413 | 0.010       | /         | 0.011 |

**Note:** Key taxa were identified applying the metagenomic biomarker discovery approach of one-way ANOVA and only the *p*-value less than 0.05 are shown. Data are expressed as mean ± Standard error of the mean (SEM). Abbreviations: HC (health control); CUMS (chronic unpredictable mild stress); TCM (traditional Chinese medicine).
